# Supplementary material for: Elucidating the Potential Inhibitor against Type 2 Diabetes Mellitus Associated Gene of GLUT4
Source: MDPI journal article supplement (doi:10.3390/jpm13040660), 2023-04-12
Supplement: s1 [file s1]

### Supplementary Tables

**Table S1.** ADME Properties by PreADMET tool

| Ligand           | %HIA      | BBB       | PPB%      | Caco-2<br>(nm/s)) | MDCK<br>(nm/s)) |
|------------------|-----------|-----------|-----------|-------------------|-----------------|
| ZINC1576020      | 24.605537 | 0.0563796 | 1.83723   | 21.0234           | 1.01374         |
| ZINC000001643171 | 86.250532 | 0.0376253 | 0.000000  | 0.38902           | 4.29762         |
| ZINC000001704450 | 56.751972 | 0.0333579 | 11.546380 | 15.745            | 249.543         |
| ZINC000017064359 | 83.479537 | 0.0391296 | 11.217050 | 19.0693           | 0.621723        |
| ZINC000216155214 | 79.395248 | 0.0161232 | 23.305426 | 0.3226            | 109.014         |
| ZINC000618254662 | 62.614416 | 0.0627102 | 11.831642 | 15.7208           | 0.465821        |

**Table S2.** Toxicity properties by PreADMET tool

| Ligand           | AMES<br>TEST | Carcinogenicity |          |
|------------------|--------------|-----------------|----------|
|                  |              | Mouse           | Rat      |
| ZINC1576020      | mutagen      | negative        | negative |
| ZINC000001643171 | mutagen      | negative        | negative |
| ZINC000001704450 | mutagen      | negative        | negative |
| ZINC000017064359 | mutagen      | negative        | negative |
| ZINC000216155214 | mutagen      | negative        | positive |
| ZINC000618254662 | mutagen      | negative        | negative |

**Table S3. Prediction of PAINS by promiscuity assessments**

| Ligand           | Probability of a compound being promiscuous PSA/CDRA |      | Promiscuity Assessment |                 | PAINS          |
|------------------|------------------------------------------------------|------|------------------------|-----------------|----------------|
|                  | PSA                                                  | CDRA | PSA classifier         | CDRA classifier |                |
| ZINC000001576020 | 0.06                                                 | 0.06 | non-promiscuous        | non-promiscuous | <b>0 alert</b> |
| ZINC000001643171 | 0.29                                                 | 0.18 | non-promiscuous        | non-promiscuous | <b>0 alert</b> |
| ZINC000001704450 | 0.05                                                 | 0.08 | non-promiscuous        | non-promiscuous | 0              |
| ZINC000017064359 | 0.12                                                 | 0.25 | non-promiscuous        | non-promiscuous | 0              |
| ZINC000216155214 | 0.43                                                 | 0.36 | non-promiscuous        | non-promiscuous | 0              |
| ZINC000618254662 | 0.18                                                 | 0.43 | non-promiscuous        | non-promiscuous | 1 alert        |
